# Supplementary material
Source: Springer Nature journal article supplement (https://www.springermedizin.de/resource/supplementary/12885_2012_3868_MOESM3_ESM.pdf/9464654)

MKN45(0)

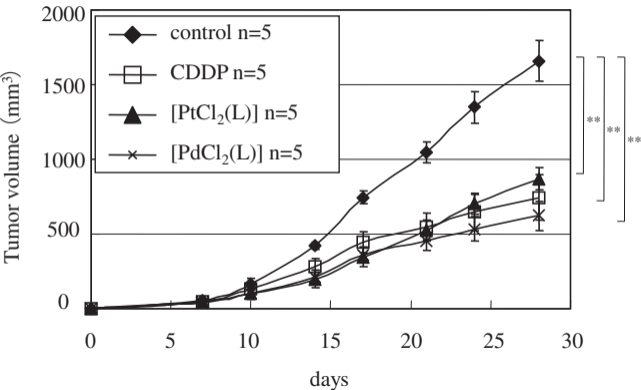

MKN45 (CDDP)

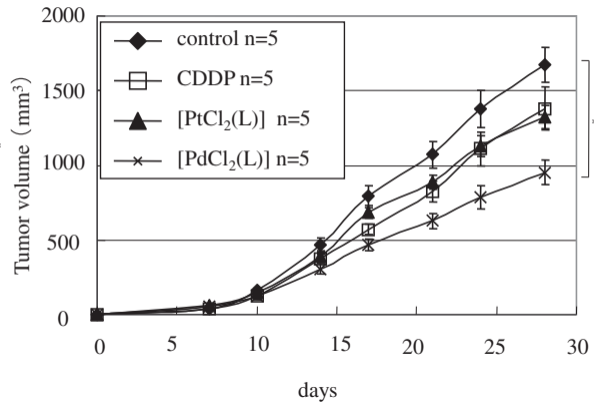

Supplement: MOESM3 [file 9464654]
